# Supplementary material for: Structural basis for specific RNA recognition by the alternative splicing factor RBM5
Source: PubMed Central journal article supplement (PMC10349855; doi:10.1038/s41467-023-39961-w), 2023-07-15
Supplement: 41467_2023_39961_MOESM1_ESM.pdf [file 41467_2023_39961_MOESM1_ESM.pdf]

# SUPPLEMENTARY INFORMATION

## **Structural basis for specific RNA recognition by the alternative splicing factor RBM5**

Komal Soni, Pravin Kumar Ankush Jagtap, Santiago Martínez-Lumbreras, Sophie Bonnal,  
Arie Geerlof, Ralf Stehle, Bernd Simon, Juan Valcárcel and Michael Sattler

### **Contents**

|                                |     |
|--------------------------------|-----|
| Supplementary Figure 1 .....   | 2   |
| Supplementary Figure 2 .....   | 3-4 |
| Supplementary Figure 3 .....   | 5   |
| Supplementary Figure 4 .....   | 6   |
| Supplementary Figure 5 .....   | 7   |
| Supplementary Figure 6 .....   | 8   |
| Supplementary Figure 7 .....   | 9   |
| Supplementary Figure 8 .....   | 10  |
| Supplementary Figure 9 .....   | 11  |
| Supplementary Figure 10 .....  | 12  |
| Supplementary Figure 11 .....  | 13  |
| Supplementary Table 1.....     | 14  |
| Supplementary Table 2.....     | 15  |
| Supplementary References ..... | 16  |

## Supplementary Figure 1

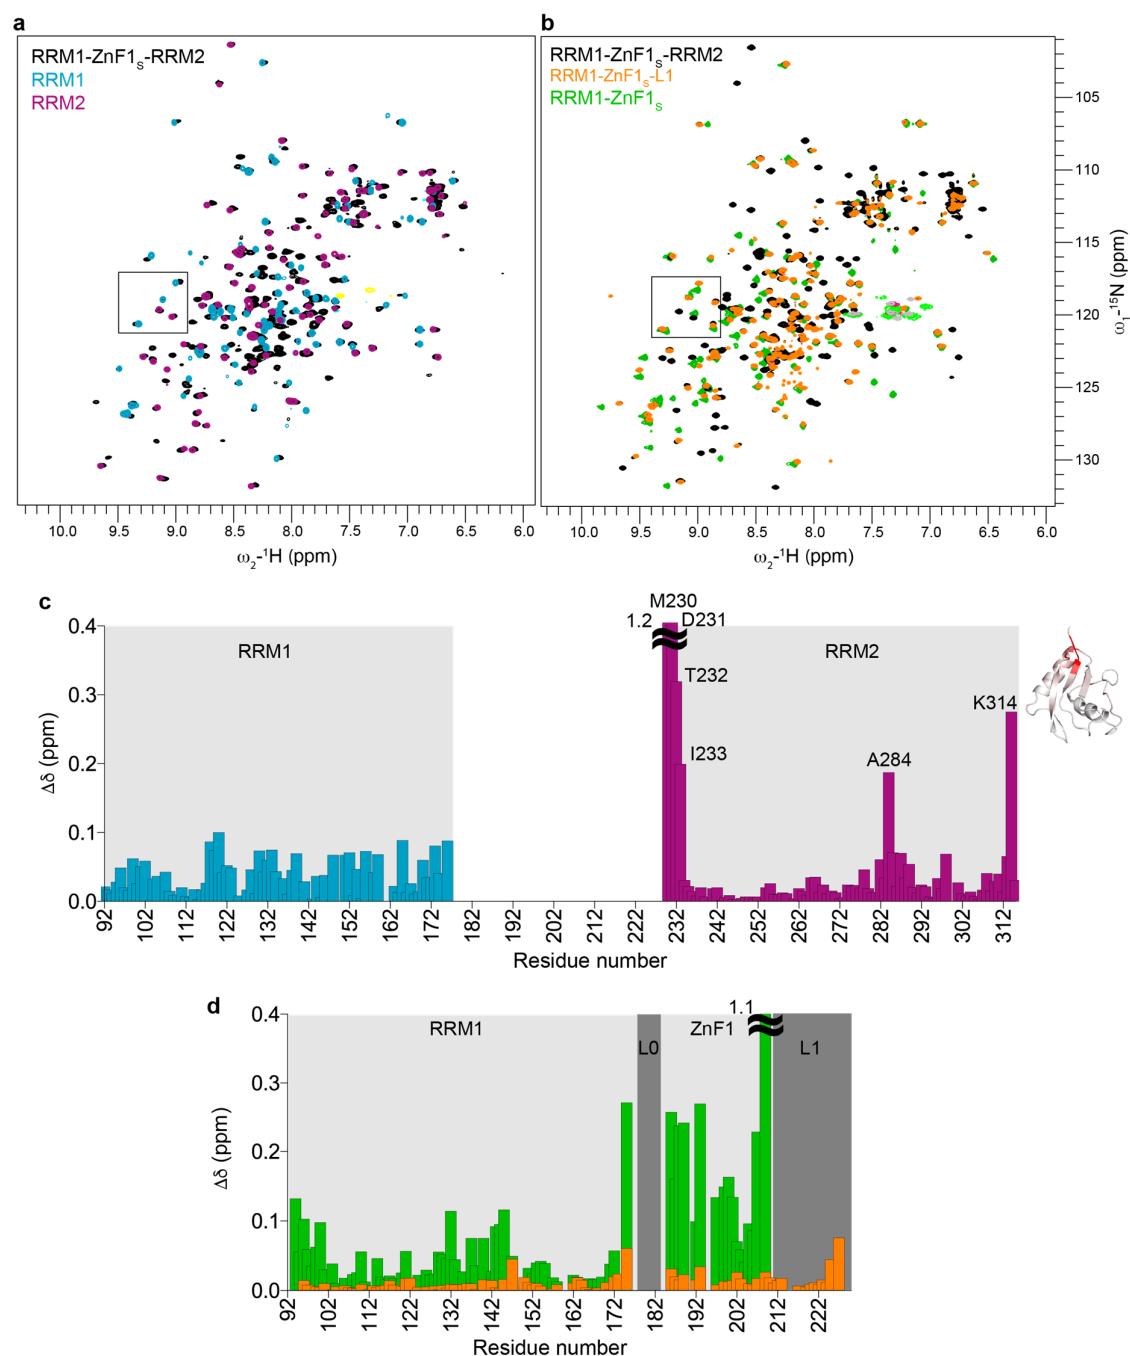

**Supplementary Figure 1.  $^1\text{H}$ ,  $^{15}\text{N}$  NMR spectra of single and multidomain constructs of RBM5.**

(a) Overlay of  $^1\text{H}$ - $^{15}\text{N}$  HSQC spectra of three RRM1-ZnF1<sub>s</sub>-RRM2 domain construct (black) and single RRM1 (light blue) and RRM2 (purple) domains. Zoomed view of residues shown in **Fig. 1c** is marked. The spectra were recorded in buffer containing 20 mM MES pH 6.5, 100 mM NaCl, 1 mM DTT. (b) Overlay of  $^1\text{H}$ - $^{15}\text{N}$ -HSQC spectra of the three RRM1-ZnF1<sub>s</sub>-RRM2 domain construct (black) with that of RRM1-ZnF1<sub>s</sub>-L1 (orange) and RRM1-ZnF1<sub>s</sub> (green). Zoomed views shown in **Fig. 1d** are indicated by rectangles. NMR spectra were recorded in buffer containing 20 mM MES pH 6.5, 400 mM NaCl, 1 mM DTT. (c) Chemical shift differences for amide signals in RRM1 (light blue) and RRM2 (purple) compared to three RRM1-ZnF1<sub>s</sub>-RRM2 domains (corresponding to  $^1\text{H}$ - $^{15}\text{N}$  HSQC spectra in panel a). For RRM2, the chemical shift differences are plotted onto the structure (PDB ID: 2LKZ) in a white to red colour scheme. (d) Chemical shift differences of amide signals in RRM1-ZnF1<sub>s</sub> (green) and RRM1-ZnF1<sub>s</sub>-L1 (orange) compared to the three RRM1-ZnF1<sub>s</sub>-RRM2 domains (corresponding to  $^1\text{H}$ - $^{15}\text{N}$  HSQC spectra in panel b). Source data are provided as a Source Data file.

## Supplementary Figure 2

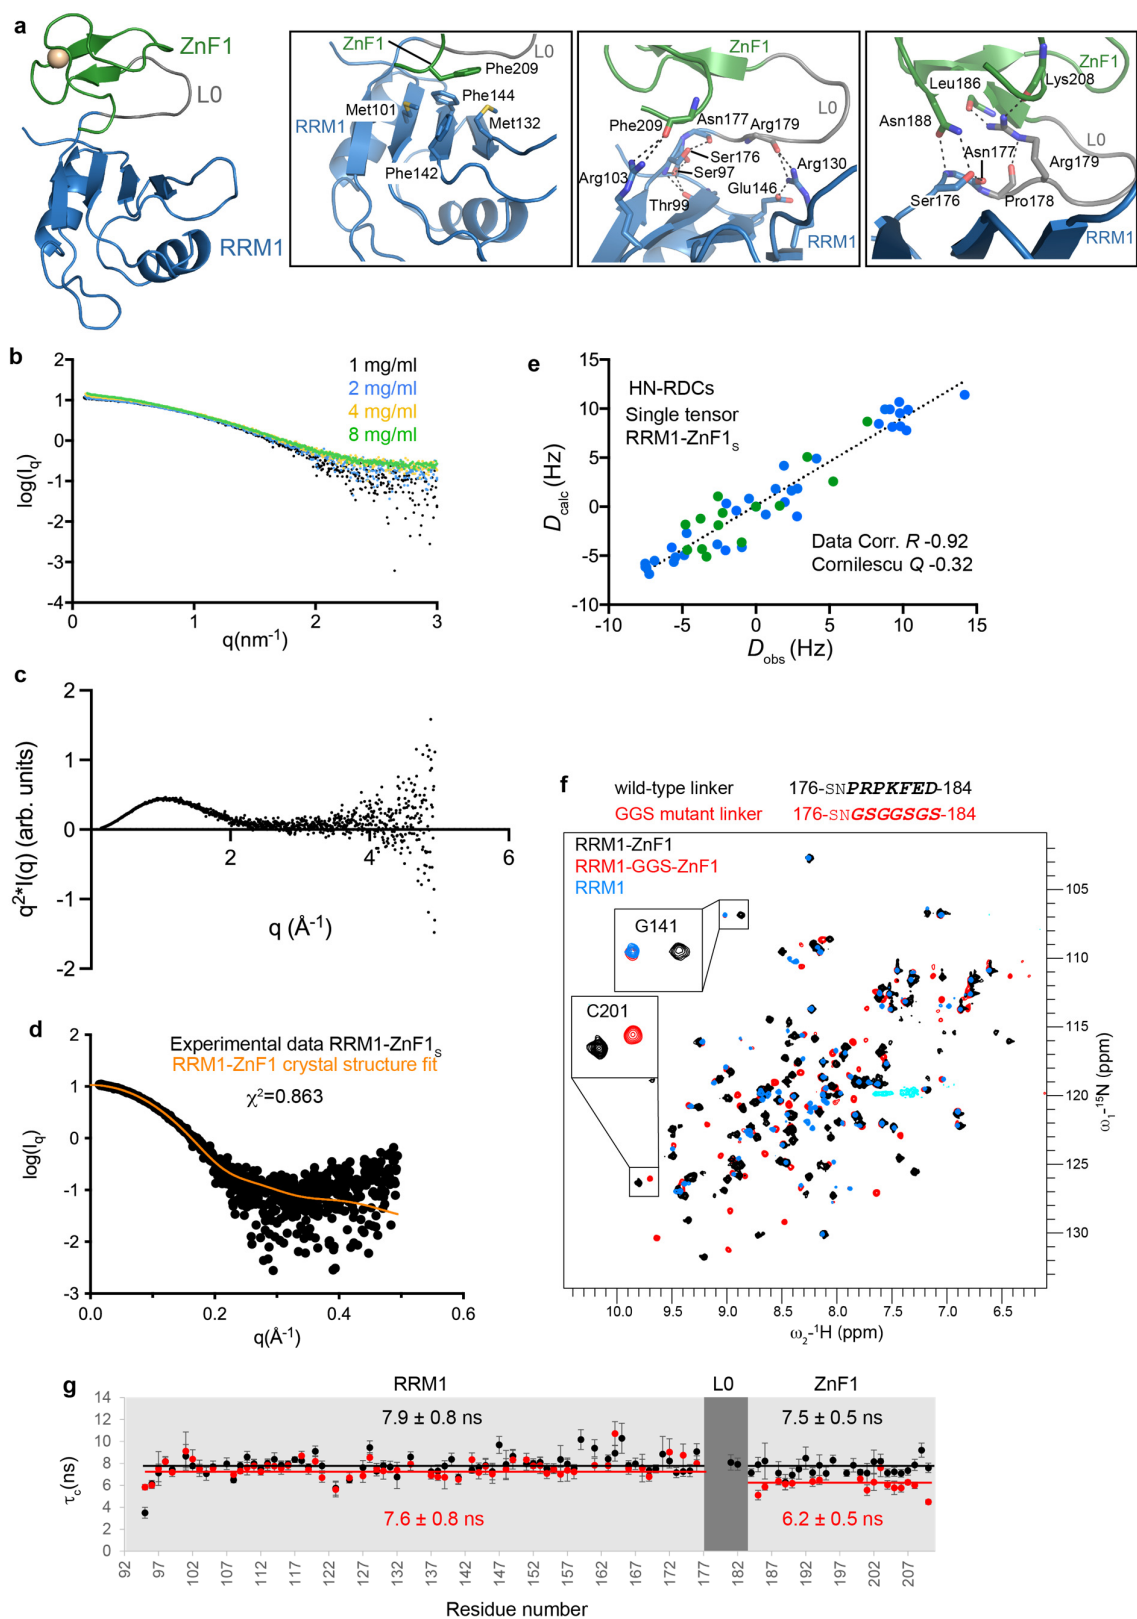

**Supplementary Figure 2. RRM1-ZnF1 crystal structure and solution conformation.**

(a) The crystal structure of RRM1-ZnF1 tandem domains is shown with RRM1, ZnF1, linker L0 and Zn<sup>2+</sup> ion colored in blue, green, gray and golden, respectively. The structure shows a tri-partite mode of interaction between

RRM1, ZnF1 and the linker connecting them (L0). Zoomed views of the interaction interface are shown in boxed panels. Dotted lines represent hydrogen bonds. **(b-g)** Validation of the solution conformation of RRM1-ZnF1. Due to instability of RRM1-ZnF1 at room temperature for longer durations, the C191G mutant was used for SAXS and NMR based RDC experiments. **(b)** Concentration dependent increase in intensity of scattering profiles is observed in RRM1-ZnF1<sub>S</sub> protein. **(c)** Kratky plot of RRM1-ZnF1<sub>S</sub> at a concentration of 1 mg/ml is presented (arbitrary units). **(d)** The fit between experimental SAXS data for RRM1-ZnF1<sub>S</sub> protein at 1 mg/ml vs. data back-calculated from the RRM1-ZnF1 crystal structure is shown (using Crysol), the  $\chi^2$  value is indicated. **(e)** Analysis of <sup>1</sup>H-<sup>15</sup>N RDCs (using 3% PEG-hexanol alignment medium) is shown. The experimental or observed RDCs ( $D_{\text{obs}}$ ) are plotted against the back-calculated RDCs ( $D_{\text{calc}}$ ) from the crystal structure and the data correlation  $R$  factor and Cornilescu  $Q$  factor are indicated. **(f)** To investigate the importance of the linker L0 as an anchor between the two domains, residues 178-184 were replaced by a stretch of Gly-Gly-Ser repeats of the same length (RRM1-GGS-ZnF1). Since many of the contacts of the linker with either of the domains are mediated by side-chain interactions, this mutant disrupts inter-domain contacts. Superposition of wild-type RRM1-ZnF1 (black), RRM1-GGS-ZnF1 linker mutant (red) and RRM1 (blue) single domain <sup>1</sup>H-<sup>15</sup>N HSQC spectra show very large chemical shift differences indicating a significant structural change. All data were collected in low salt buffer (100 mM NaCl) and at low concentrations for tandem domain constructs (due to instability of the protein in low salt conditions are high concentrations). Zoomed views of two residues (Gly141, Cys201) demonstrate that the chemical shifts of residues in single domains are comparable to those in the RRM1-GGS-ZnF1 linker mutant **(g)** Local rotational correlation time ( $\tau_c$ ) are calculated from <sup>15</sup>N  $R_1$  and  $R_2$  relaxation rates vs. residue numbers for wild-type RRM1-ZnF1 (black), RRM1-GGS-ZnF1 linker mutant (red). The average and standard deviation is listed for each domain. The faster tumbling of the ZnF1 domain with a reduction of  $\tau_c$  from 7.5 ns to 6.2 ns from wild-type to the RRM1-GGS-ZnF1 mutant indicates that the linker mutation disrupts interactions between the linker and the two flanking domains. The flexible GGS-linker allows the two domains to tumble independently, with domain-specific tumbling correlation times that reflect their size difference. Error bars are derived from relaxation data. The mean  $\pm$  SD in  $\tau_c$  calculated for all residues is shown. Source data are provided as a Source Data file.

### Supplementary Figure 3

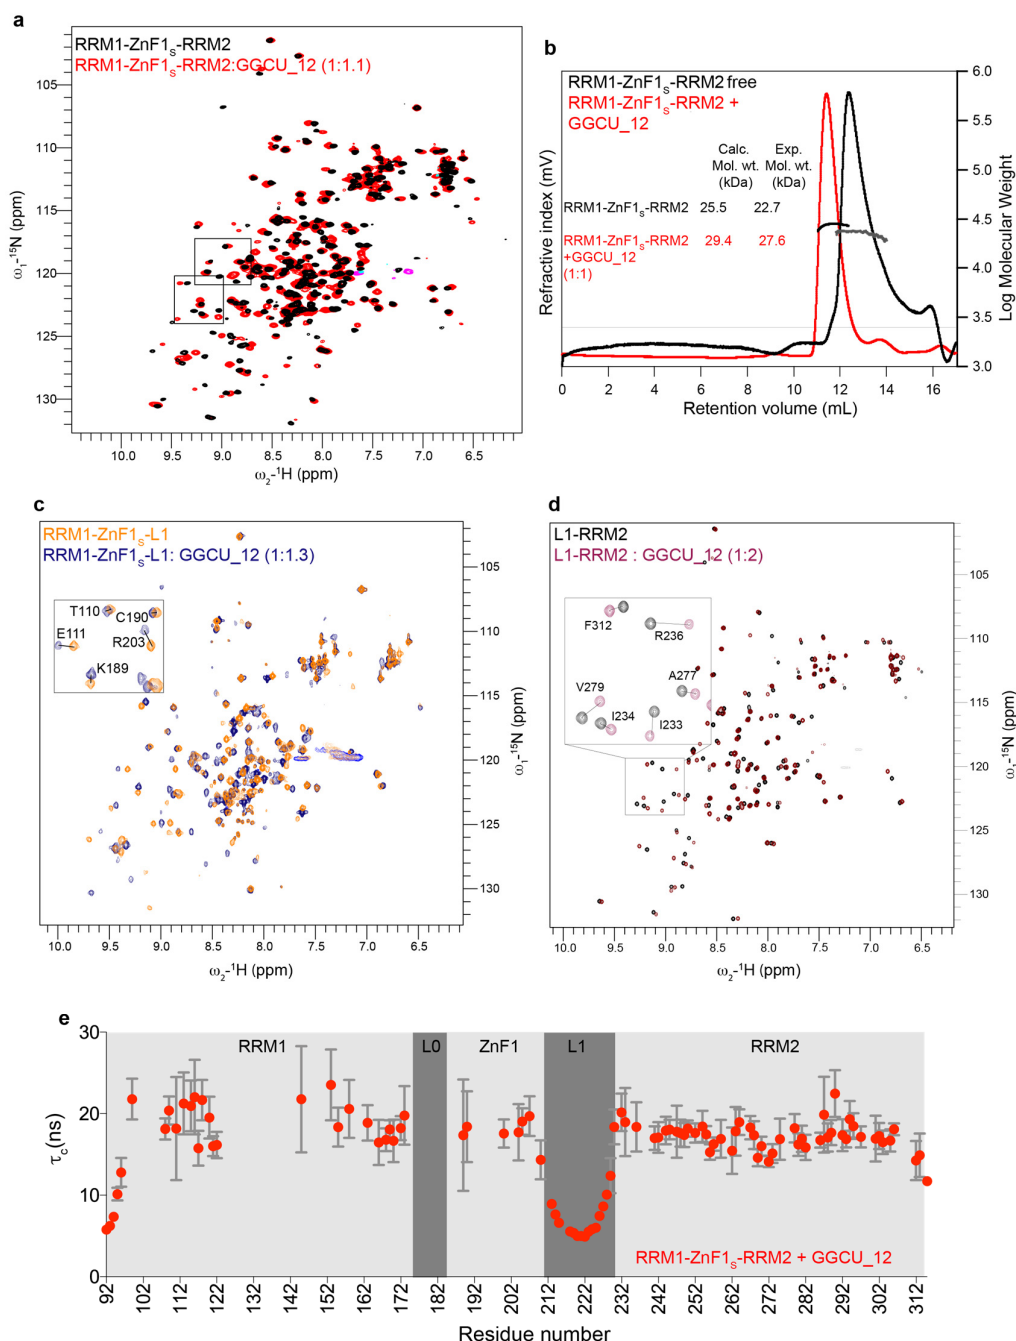

### Supplementary Figure 3. RRM1, ZnF1 and RRM2 all bind GGCU\_12

(a) Overlay of <sup>1</sup>H-<sup>15</sup>N HSQC spectra of RRM1-ZnF1<sub>s</sub>-RRM2 free (black) and bound to GGCU\_12 RNA (red). Zoomed views of residues shown in Fig. 2a are marked, the corresponding CSP plot is shown in Fig. 2b. (b) Size-exclusion chromatography coupled to static light scattering for measurement of molecular weights of RRM1-ZnF1<sub>s</sub>-RRM2 free (black) and in complex with GGCU\_12 (red). The peak regions used for calculation of experimental molecular weights are marked. The calculated molecular weight from sequence (Calc. Mol. wt.) and experimental molecular weights (Exp. Mol. wt.) are indicated. (c) Overlay of <sup>1</sup>H-<sup>15</sup>N HSQC spectra of RRM1-ZnF1<sub>s</sub>-L1 +/- GGCU\_12 (orange, blue), corresponding to CSP plot in Fig. 2b. (d) Overlay of <sup>1</sup>H-<sup>15</sup>N HSQC spectra of L1-RRM2 +/- GGCU\_12 (black, purple), corresponding to CSP plot in Fig. 2b. (e) Linker L1 remains flexible in RRM1-ZnF1<sub>s</sub>-RRM2 upon RNA binding. Local tumbling rotational correlation time ( $\tau_c$ ) calculated from <sup>15</sup>N R<sub>1</sub> and R<sub>2</sub> rates vs. residue number for RRM1-ZnF1<sub>s</sub>-RRM2 + GGCU\_12 RNA (red). Error bars are derived from relaxation data. Source data are provided as a Source Data file.

## Supplementary Figure 4

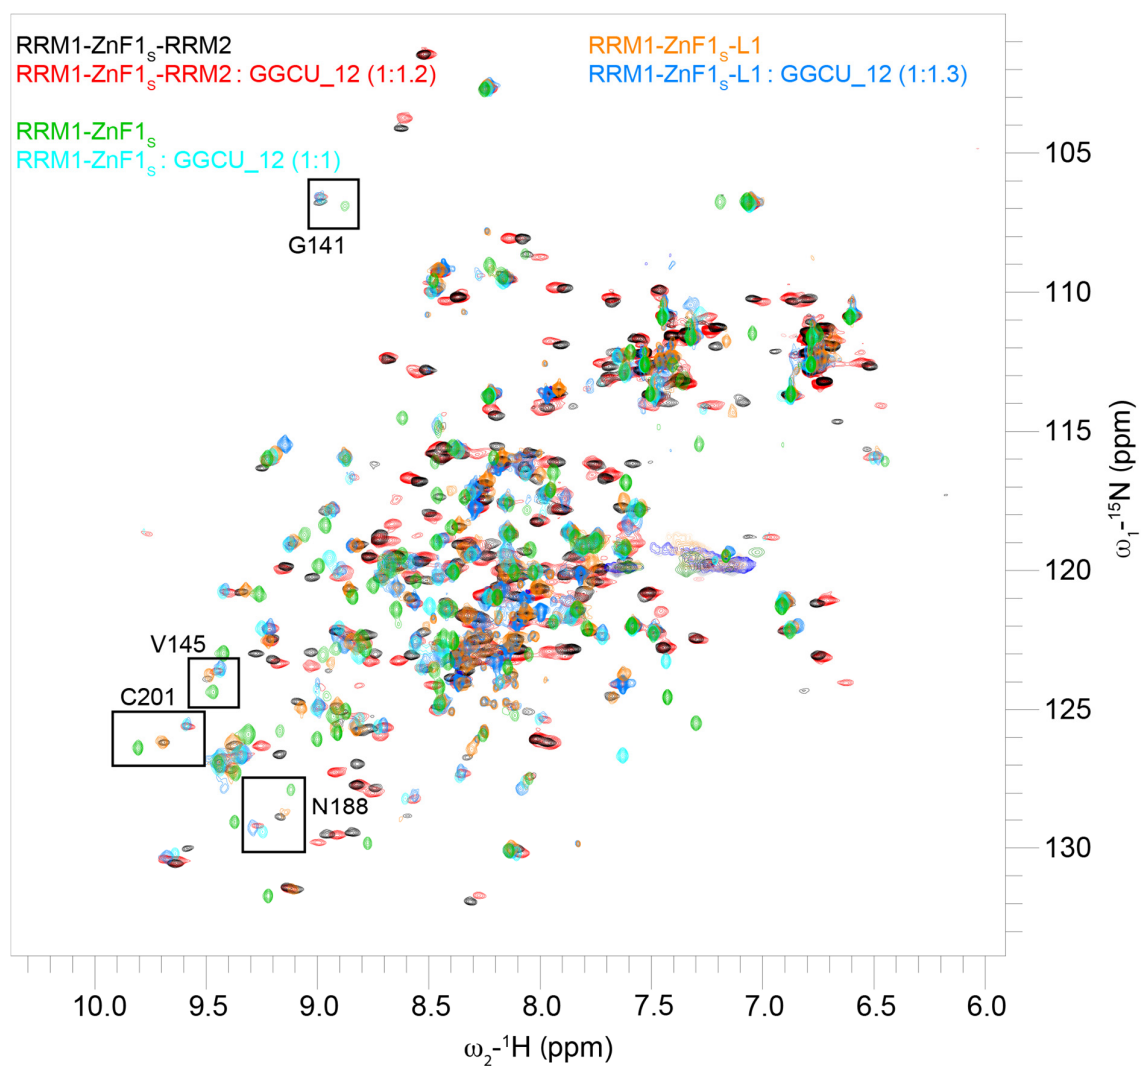

### Supplementary Figure 4. RNA binding by RRM1-ZnF1<sub>s</sub>-RRM2, RRM1-ZnF1<sub>s</sub>-L1 and RRM1-ZnF1<sub>s</sub> is similar.

Overlay of <sup>1</sup>H-<sup>15</sup>N HSQC spectra of RRM1-ZnF1<sub>s</sub>-RRM2 +/- GGCU\_12 (black, red), RRM1-ZnF1<sub>s</sub>-L1 +/- GGCU\_12 (orange, blue) and RRM1-ZnF1<sub>s</sub> +/- GGCU\_12 (green, cyan) are shown. Zoomed views of residues shown in Fig. 2d are marked.

## Supplementary Figure 5

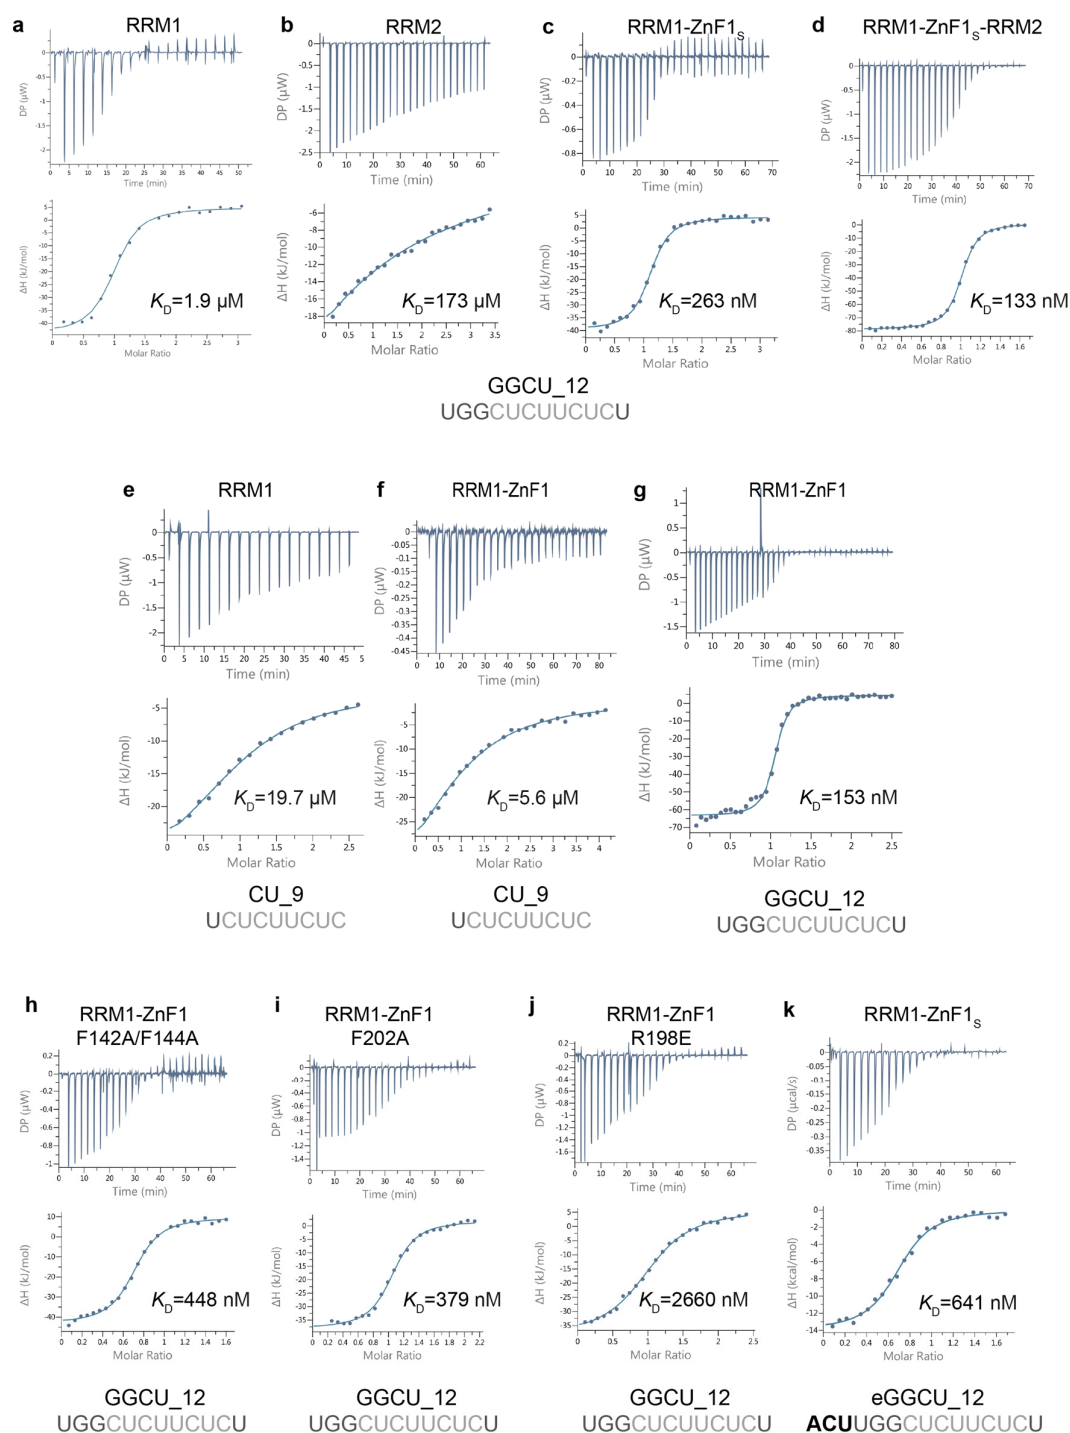

### Supplementary Figure 5. ITC binding isotherms.

**(a-d)** Cooperative binding by the different RNA binding domains of RBM5. ITC binding isotherms of RRM1, RRM2, RRM1-ZnF1<sub>s</sub> and RRM1-ZnF1<sub>s</sub>-RRM2 with GGCU\_12 are shown in panels a-d, respectively. **(e-g)** RRM1 and ZnF1 both have RNA binding affinity contribution towards the GG motif. ITC binding isotherms of RRM1 and RRM1-ZnF1 with CU\_9 and RRM1-ZnF1 with GGCU\_12 are shown in panels e-f, respectively. **(h-j)** RNA binding contribution of specific residues of RRM1 and ZnF1. ITC binding isotherms of RRM1-ZnF1<sub>F142A/F144A</sub>, RRM1-ZnF1<sub>F202A</sub> and RRM1-ZnF1<sub>R198E</sub> with GGCU\_12 are shown in panels h-j, respectively. The average binding affinities derived from duplicate measurements are listed. **(k)** ITC binding isotherm of RRM1-ZnF1<sub>s</sub> with an extended version of GGCU\_12 at the 5'-end (eGGCU\_12).

## Supplementary Figure 6

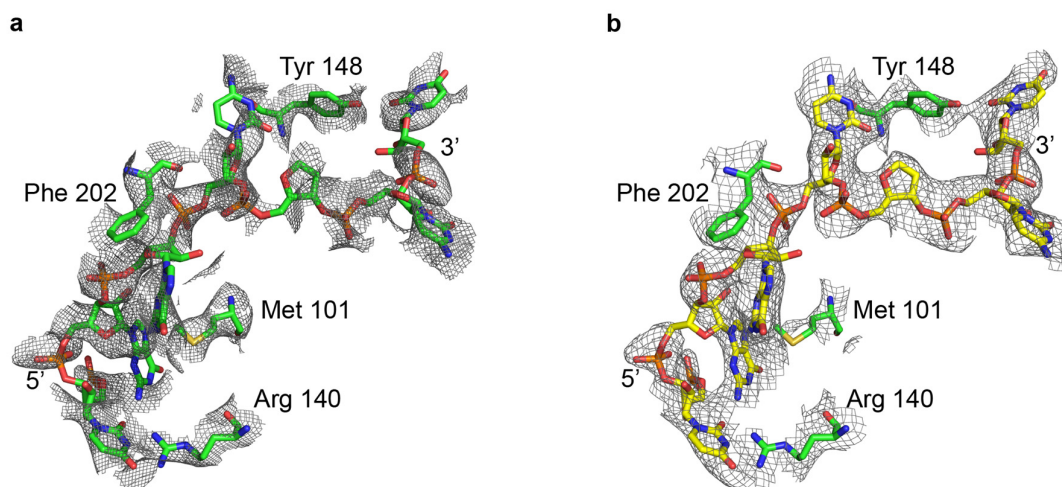

### Supplementary Figure 6. Modeling of GGCU\_10 RNA into the electron density

(**a**)  $F_o-F_c$  map (contoured at  $1\sigma$ ,  $0.12 e/\text{\AA}^2$ ) of the RNA (before modeling it into the electron density) and (**b**)  $2F_o-F_c$  omit map (contoured at  $1\sigma$ ,  $0.23 e/\text{\AA}^2$ ) are shown around  $1.6 \text{\AA}$  of the RNA atoms.



### Supplementary Figure 7

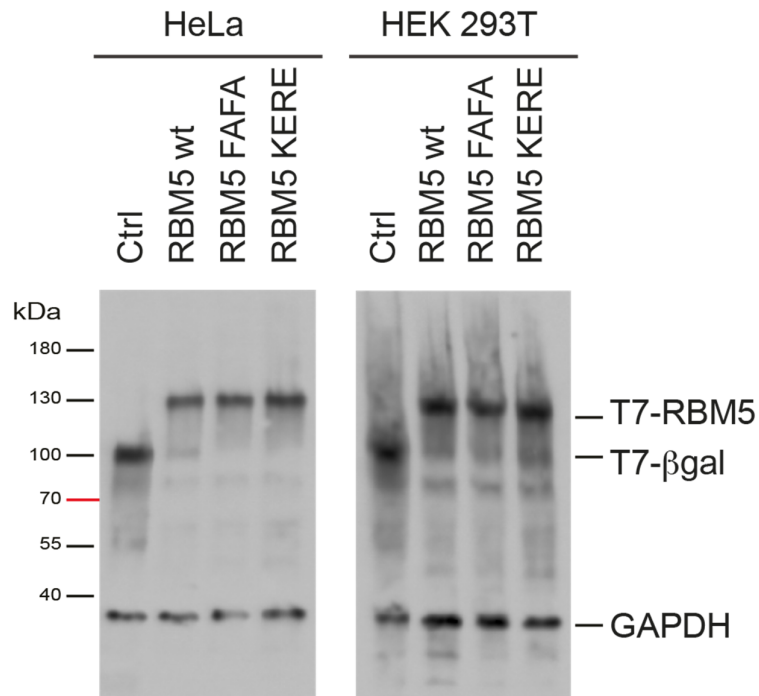

### Supplementary Figure 7. Expression of RBM5 RRM1 and ZnF1 mutants in *RG6-NUMB* minigene reporter assay

HeLa and HEK 293T cells were co-transfected with *RG6-NUMB* alternative splicing reporter and T7-RBM5 vectors expressing wild type or RNA binding affinity mutants in the RRM1 (F142A/F144A-> FAFA) or ZnF1 (K197E/R197E-> KERE) or control vector (expressing beta-galactosidase), as indicated. Protein expression was assessed by western blot using anti-T7 epitope antibodies and protein loading was assessed by measuring the levels of GAPDH. The results correspond to one representative replicate of the experiment. Each condition in HeLa cells has been replicated 5 times. Number of replicates in HEK 293T cells are: 6 Ctr, 13 RBM5 wt, 7 RBM5 FAFA, 7 RBM5 KERE. Uncropped gels are provided in Source Data.

## Supplementary Figure 8

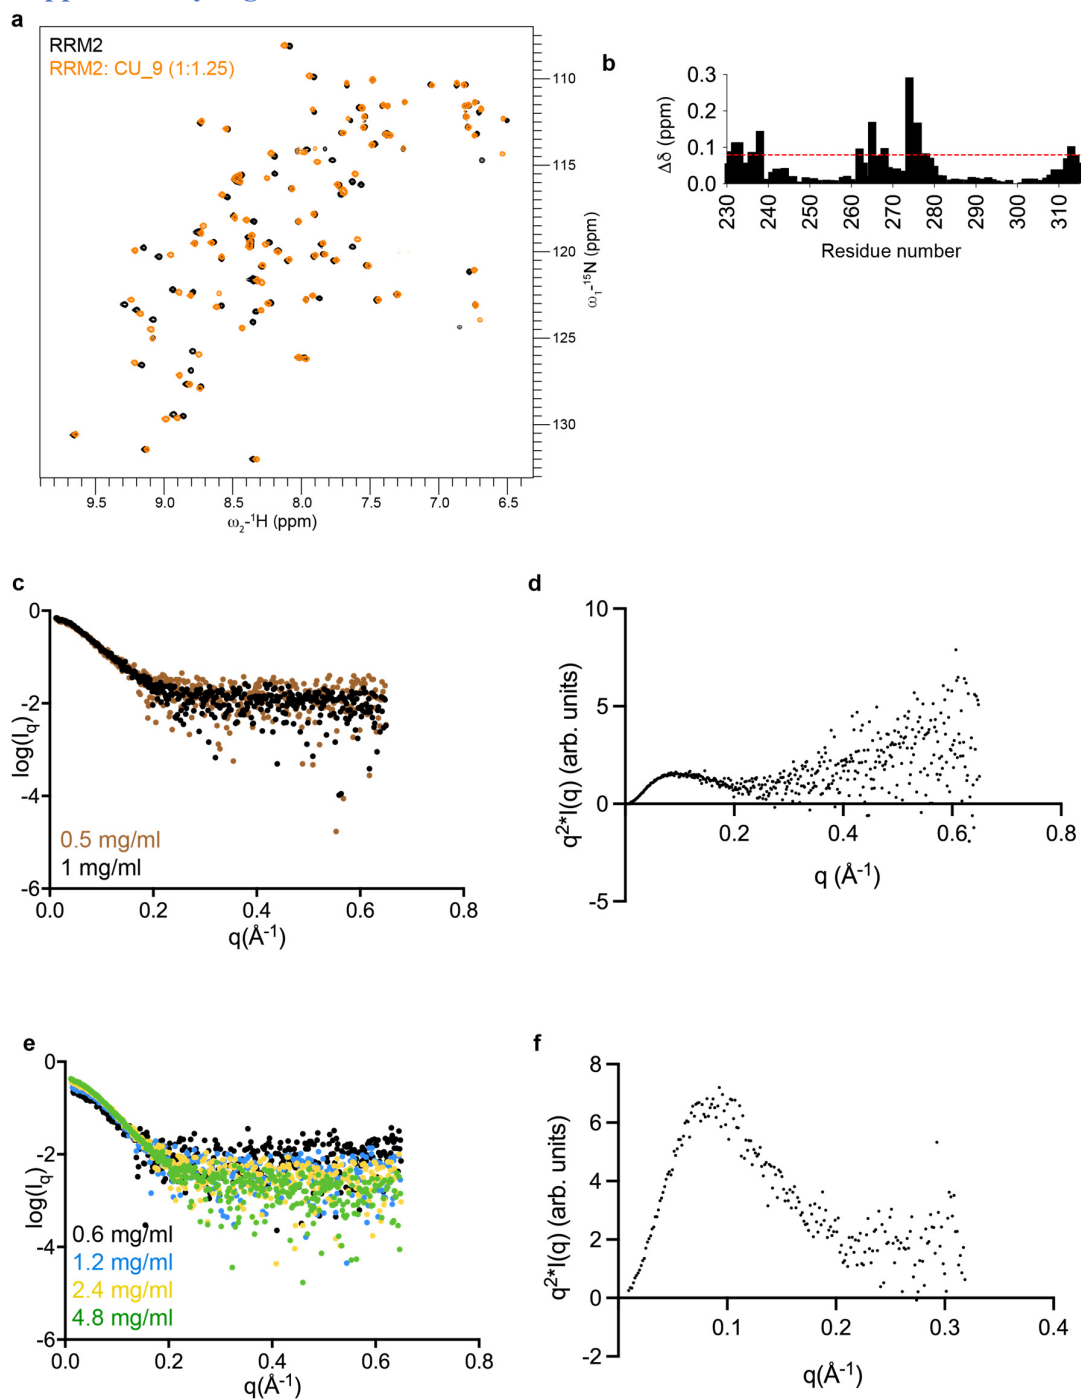

### Supplementary Figure 8. RNA binding of RRM2 and SAXS analysis of RRM1-ZnF1s-RRM2 +/- RNA

(a) Overlay of  $^1\text{H}$ - $^{15}\text{N}$  HSQC spectra of RRM2 free (black) and bound to CU\_9 RNA (orange). (b) Chemical shift perturbations in RRM2 upon binding to CU\_9 RNA at a ratio of 1:1.25 (protein:RNA) vs. residue number are shown. Protein residues which satisfy a threshold RNA binding criterion ( $\Delta\delta > 0.08$ , shown as red dashed line): Asp231, Thr232, Ile233, Arg236, Ile238, Ile262, Ile265, Lys268, Arg274, Phe276, Phe278 and Ala313 were used to generate ambiguous distance restraints to the RNA during structure modeling. (c) Small angle X-ray scattering (SAXS) profiles for RRM1-ZnF1s-RRM2 at 0.5 mg/ml and 1 mg/ml. (d) Kratky plot of RRM1-ZnF1s-RRM2 at a concentration of 1 mg/ml is shown. (e) Concentration-dependent increase in intensity of the scattering profiles is observed for the RRM1-ZnF1s-RRM2 + GGCU\_12 RNA complex. Data at lowest concentration were carefully merged with those at higher concentrations and used for further analysis. (f) The corresponding Kratky plot of the RRM1-ZnF1s-RRM2 + GGCU\_12 RNA complex is shown. Source data are provided as a Source Data file.

## Supplementary Figure 9

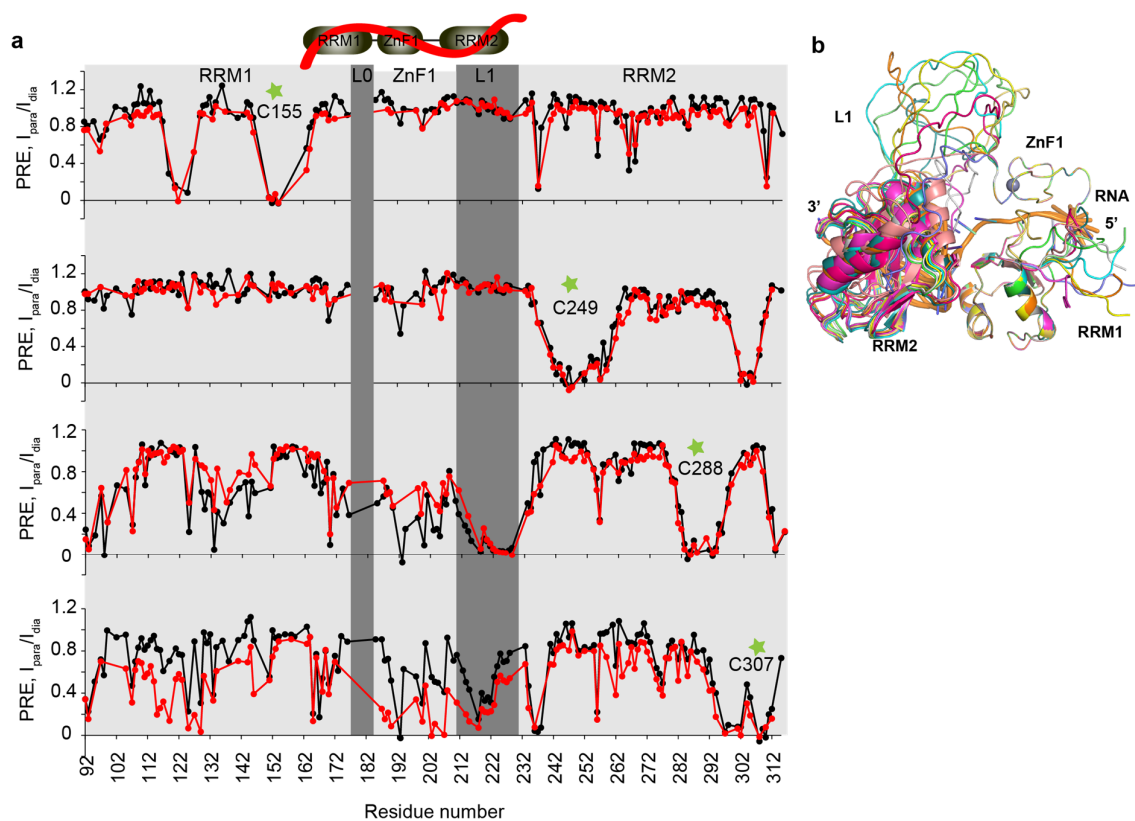

**Supplementary Figure 9. Structural model of RBM5 RRM1-ZnF1-RRM2 when bound to RNA.**

**(a)** PRE ratio of NMR signal intensities in the paramagnetic and diamagnetic state, ( $I_{\text{para}}/I_{\text{dia}}$ ) observed in RRM1-ZnF1<sub>S</sub>-RRM2 free (black) and bound to GGCU<sub>12</sub> RNA (red) vs. residue number. Spin label positions are marked by green stars: C155, C249, C288 and C307. **(b)** Superposition of 10 lowest energy structures of RRM1-ZnF1<sub>S</sub>-RRM2 in the presence of RNA obtained from PRE-based structure calculations is shown in different colours. Source data are provided as a Source Data file.

## Supplementary Figure 10

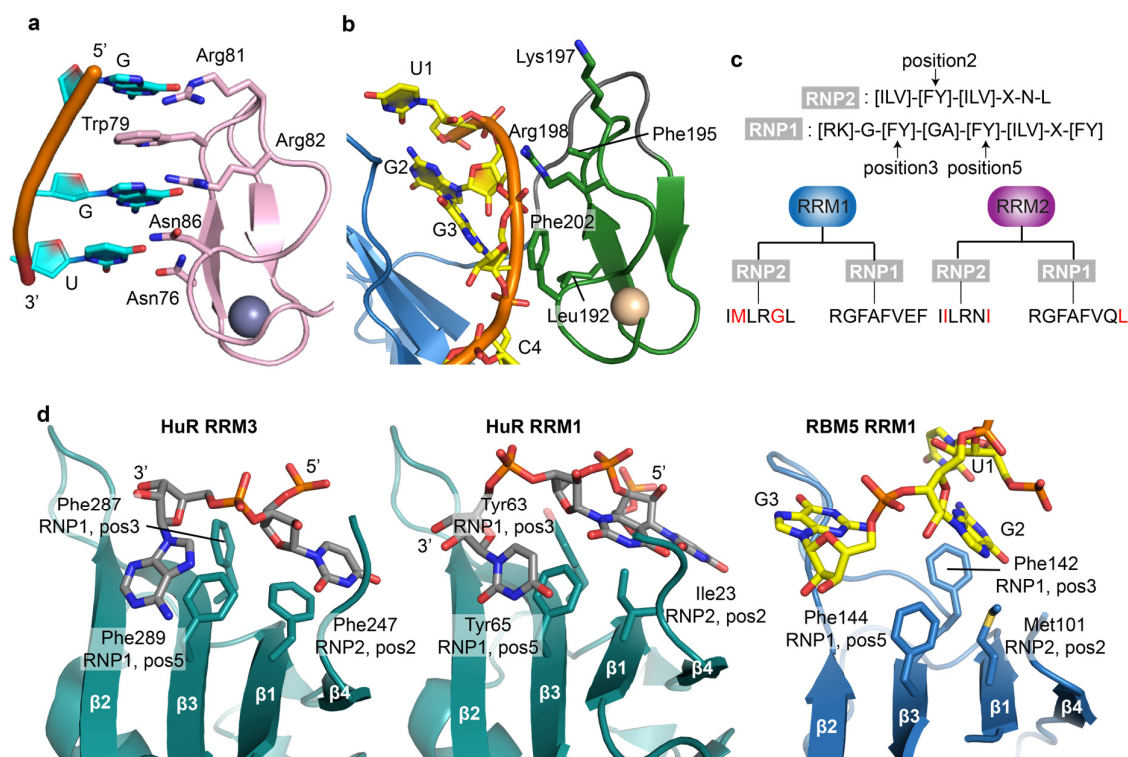

### Supplementary Figure 10. Comparison of RBM5 RRM1-ZnF1 with canonical RanBP2-type zinc finger and RRM domains

(a) Structure of RanBP2-type Zinc finger domain (ZRANB2-F2) in complex with GGU motif RNA (PDB ID: 3G9Y<sup>1</sup>) is shown. Gua-Trp-Gua ladder formed between the protein and RNA is indicated. (b) A view of RBM5 RRM1-ZnF1s bound to GGCU<sub>10</sub> RNA crystal structure. Residues corresponding to ZRANB2 F2 involved in RNA recognition are marked. (c) Canonical RNP2/RNP1 residues of RRM domains are represented, with those in RBM5 RRM1 and RRM2 deviating from the canonical sequences shown in red. (d) Crystal structures of HuR RRM3 (teal) bound to RNA (grey) (PDB ID: 6GD3<sup>2</sup>), HuR RRM1 (teal) bound to RNA (grey) (PDB ID: 4ED5<sup>3</sup>) and RBM5 RRM1 (blue) bound to RNA (yellow) (this study, linker L0 and ZnF1 are not shown). For simplicity, only 2-3 nucleotides stacking with position2 of RNP2, positions 3 and 5 of RNP1 of the different RRM domains are shown.

## Supplementary Figure 11

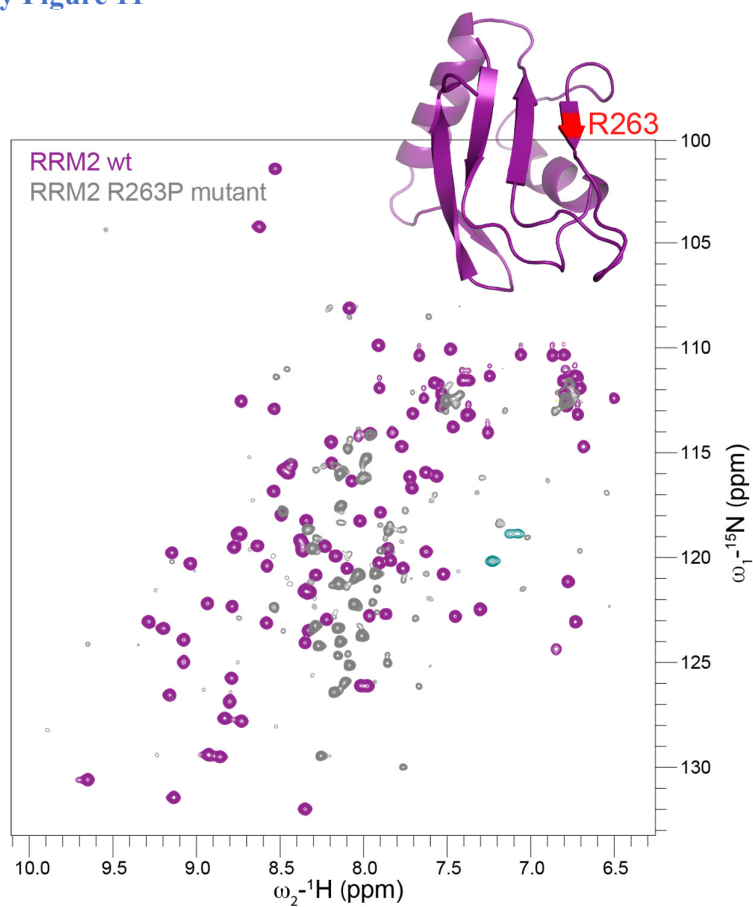

### Supplementary Figure 11. Male sterility associated mutation in RBM5 RRM2

A superposition of  $^1\text{H}$ ,  $^{15}\text{N}$ -HSQC spectra of wild-type RRM2 (purple) and RRM2 R263P mutant protein (grey) is presented. The position of point mutation is shown on the structure of RRM2 (PDB ID: 2LKZ) in red. R263P compromises the structural integrity of RBM5 RRM2.

**Supplementary Table 1**

| Parameters                                  | RRM1-ZnF1s   | RRM1-ZnF1s-RRM2<br>apo     | RRM1-ZnF1s-RRM2:<br>+GGCU_12 RNA |
|---------------------------------------------|--------------|----------------------------|----------------------------------|
| <b>Data-collection</b>                      |              |                            |                                  |
| Mode                                        | Batch        | Batch                      | Batch                            |
| Instrument                                  | BioSAXS BM29 | Rigaku                     | Rigaku                           |
|                                             | ESRF         | BIOSAXS1000                | BIOSAXS1000                      |
| Beam geometry                               | 10 mm slit   | 10 mm slit                 | 10 mm slit                       |
| Wavelength (Å)                              | 0.9919       | 1.5                        | 1.5                              |
| q range (Å <sup>-1</sup> )                  | 0.0029-0.494 | 0.004-0.65                 | 0.004-0.65                       |
| Exposure time (s)                           | 15 (15x1s)   | 7200 (8x900s)              | 7200 (8x900s)                    |
| Concentration (mg/ml)                       | 1            | 1                          | Data merged                      |
| Temperature (°C)                            | 20           | 5                          | 5                                |
| <b>Structural parameters</b>                |              |                            |                                  |
| $R_g$ (Å) [from $p(r)$ ]                    | 16.822       | 24.3                       | 22.56                            |
| $R_g$ (Å) [from Guinier]                    | 16.7 ± 0.02  | 23.3 ± 1.93                | 22.29 ± 3.52                     |
| $D_{max}$ (Å)                               | 56           | 78                         | 75                               |
| <b>Molecular weight determination (kDa)</b> |              |                            |                                  |
| From size & shape                           | 15.0         | 23.9                       | 27.7                             |
| From volume of correlation ( $V_c$ )        | 14.9         | 19.7                       | 24.7                             |
| Calculated molecular weight                 | 13.9         | 25.5                       | 29.4                             |
| <b>Software employed</b>                    |              |                            |                                  |
| Primary data reduction                      | BsxCuBE      | Rigaku SAXSLab<br>v3.0.lr1 | Rigaku SAXSLab<br>v3.0.lr1       |
| Data processing                             | PRIMUS       | PRIMUS                     | PRIMUS                           |
| Computation of model intensities            | CRY SOL      |                            | CRY SOL                          |

**Supplementary Table 1.** SAXS data collection and processing statistics

**Supplementary Table 2**

| Name                    | Sequence (5'→3')                                                                            |
|-------------------------|---------------------------------------------------------------------------------------------|
| RRM1-FP-NcoI            | TGAGCCATGGGC GAGAGGGAGAGCAAGACCATC                                                          |
| RRM1-RP-BamHI           | AGTGGGATCCTTAATCTTCAAACCTTAGGTCTGGGATTGC                                                    |
| RRM1ZnF1-RP-BamHI       | AGTGGGATCC TTAGTCAAACCTGTCTGCTCCACATC                                                       |
| RRM2-FP-NcoI            | CATGCCATGGATACGATCATTCTTCGGAACATAG                                                          |
| RRM2-RP-BamHI           | AGTGGGATCCTTAACCTTTTGCAAATCAACCCCAATAG                                                      |
| RRM1-F142A/F144A-FP     | GTAAGCCGTGGTGC GGCCGCGGTGGAGTTTTAT                                                          |
| RRM1-F142A/F144A-RP     | ATAAACTCCACCGCGGCCGACCACGGCTTAC                                                             |
| RRM1ZnF1-F202A-BamHI-RP | AGTGGGATCCTTAGTCAAACCTGTCTGCTCCACATCGCGCGCATT<br>TTAGTCT                                    |
| RRM1ZnF1-R198E-BamHI-RP | AGTGGGATCCTTAGTCAAACCTGTCTGCTCCACATCGGAAGCATT<br>TTAGTTCTTTCCTGAAATT                        |
| RRM2-R263P-FP           | AGCTGTCAATAACATCCCGCTCATAAAAGAC                                                             |
| RRM2-R263P-RP           | CGAAGCCTCTGTTCTGCTGGGTCTGTTTGTCTTTTATGAGCGGA<br>TGTTATTGACAGCT                              |
| RRM1-GGS-ZnF1-FP        | GATTCAAGGAAAGCACATTGCAATGCATTATAGCAATGGCAGCG<br>GAGGCAGTGGCTCTTGGCTTTGTAACAAG               |
| RRM1-GGS-ZnF1-RP        | CTTGTTACAAAGCCAAGAGCCACTGCCTCCGCTGCCATTGCTATA<br>ATGCATTGCAATGTGC                           |
| RRM1ZnF1-C191G-BamHI-RP | AGTGGGATCCTTAGTCAAACCTGTCTGCTCCACATCGGAAGCATT<br>TTAGTCTTTCCTGAAATTGTTAAGCCGCACTTGTACAAAGCC |
| C230S-FP                | TCCGTGGATTACTACTCTGACACCATCATCTTG                                                           |
| C230S-RP                | CAAGATGATGGTGTGTCAGAGTAGTAATCCACGGA                                                         |
| S155C-FP                | CTGCAGGACGCGACATGCTGGATGGAAGCGAAT                                                           |
| S155C-RP                | ATTCGCTTCCATCCAGCATGTCGCGTCCTGCAG                                                           |
| T249C_FP                | GTGGACTCCATTATGTGCGCCCTTCTCCATAC                                                            |
| T249C_RP                | GTATGGAGAAAGGGCGCACATAATGGAGTCCAC                                                           |
| S288C_FP                | TCAGCAATGGATGCCTGCCAACTCCTGCAG                                                              |
| S288C_RP                | CTGCAGGAGTTGGCAGGCATCCATTGCTGA                                                              |
| 3Do-opt- NcoI-FP        | TGAGCCATGGGCGAACGCGAGTCCAAAACCATC                                                           |
| T307C_RP                | AGTGGGATCCTTAGGATTTGGCGAAATCCACACCAATGCATTGTC<br>CATCGAT                                    |
| L1-opt-BamHI-RP         | AGTGGGATCCTTAACAGTAGTAATCCACGGATTGTAC                                                       |
| L1-opt-NcoI-FP          | TGAGCCATGGGCTCGGAACAGGAGGTTCCAC                                                             |
| 3Do-opt-BamHI-RP        | AGTGGGATCCTTAGGATTTGGCGAAATCCACACC                                                          |
| RG6-S                   | GGATTACAAGGATGACGATGACAAGGG                                                                 |
| RG6-AS                  | GTCACCTCAGCTTACGGTGTTGTG                                                                    |

**Supplementary Table 2.** Primers used in this study.

## Supplementary References

1. Loughlin, F.E. et al. The zinc fingers of the SR-like protein ZRANB2 are single-stranded RNA-binding domains that recognize 5' splice site-like sequences. *Proc Natl Acad Sci U S A* **106**, 5581-6 (2009).
2. Pabis, M. et al. HuR biological function involves RRM3-mediated dimerization and RNA binding by all three RRMs. *Nucleic Acids Res* **47**, 1011-1029 (2019).
3. Wang, H. et al. The structure of the ARE-binding domains of Hu antigen R (HuR) undergoes conformational changes during RNA binding. *Acta Crystallogr D Biol Crystallogr* **69**, 373-80 (2013).
